# Supplementary material for: Blocking P2X purinoceptor 4 signalling alleviates cigarette smoke induced pulmonary inflammation
Source: PubMed Central journal article supplement (PMC9175376; doi:10.1186/s12931-022-02072-z), 2022-06-08
Supplement: 12931_2022_2072_MOESM1_ESM.pdf [file 12931_2022_2072_MOESM1_ESM.pdf]

## Blocking P2X Purinoceptor 4 Signalling Alleviates Cigarette Smoke-Induced Pulmonary Inflammation

### Primer Sequences:

human *b2m*: Forward: 5'-GATAGTTAAGTGGGATCGAGACATG-3'  
Reverse: 5'-AAAAGCAAGCAAGCAGAATTTGG-3'  
Probe: 5'-FAM-AATGCGGCATCTTCAAACCTCCATGAT-Tamra-3'

human *P2RX4*: Forward: 5'-ATCCGCAGCCGCAAAGTG-3'  
Reverse: 5'-CACGGAGTCAGTTTCCTGGTAG-3'  
Probe: 5'-FAM-AATGCGGCATCTTCAAACCTCCATGAT-Tamra-3'

murine *b2m*: Forward: 5'-GCAGAGTTAAGCATGCCAGTAT-3'  
Reverse: 5'-GGTTCAAATGAATCTTCAGAGCATC-3'  
Probe: 5'-FAM-TGATGCTTGATCACATGTCTCGATCCCAGTA-Tamra-3'

murine *P2rx4*: Forward: 5'-AACACTTCTCAGCTTGGATTCCG-3'  
Reverse: 5'-TTCACGGTGACGATCATGTTGG-3'  
Probe: 5'-FAM-AGTTTTTCCTCCTGAGCTGGGACCACATAGTC-Tamra-3'

murine *P2rx7*: Forward: 5'-AAGTGGGTCTTGACATGATC-3'  
Reverse: 5'-ATGCCTTTGACCTTGGTGTG-3'  
Probe: 5'-FAM-TCTTTTCCTACATTAGCTTTGCTTTGGTGAGC-Tamra-3'

**Supplementary Table 1: Descriptive statistics of BALF donors**

|                              | <b>GOLD I &amp; II</b> | <b>GOLD III &amp; IV</b> | <b>Total COPD patients</b> | <b>Non-smokers</b> |
|------------------------------|------------------------|--------------------------|----------------------------|--------------------|
| No. of Patients              | 9                      | 6                        | 15                         | 15                 |
| Age in years (mean $\pm$ SD) | 62.2 $\pm$ 9.3         | 69.0 $\pm$ 5.3           | 64.9 $\pm$ 8.6             | 36.9 $\pm$ 11.3    |
| Male in %                    | 77.8                   | 50.0                     | 66.7                       | 40.0               |
| GOLD ratio                   | 4 / 5                  | 3 / 3                    | -                          | -                  |

**Supplementary Table 2: Descriptive statistics of MNCs donors**

|                              | <b>GOLD I &amp; II</b> | <b>GOLD III &amp; IV</b> | <b>Total COPD patients</b> | <b>Non-smokers</b> |
|------------------------------|------------------------|--------------------------|----------------------------|--------------------|
| No. of Patients              | 12                     | 14                       | 26                         | 22                 |
| Age in years (mean $\pm$ SD) | 58.8 $\pm$ 10.1        | 59.5 $\pm$ 6.6           | 59.2 $\pm$ 8.4             | 28.9 $\pm$ 4.3     |
| Male in %                    | 83.3                   | 42.9                     | 61.5                       | 50.0               |
| GOLD ratio                   | 5 / 7                  | 9 / 5                    | -                          | -                  |

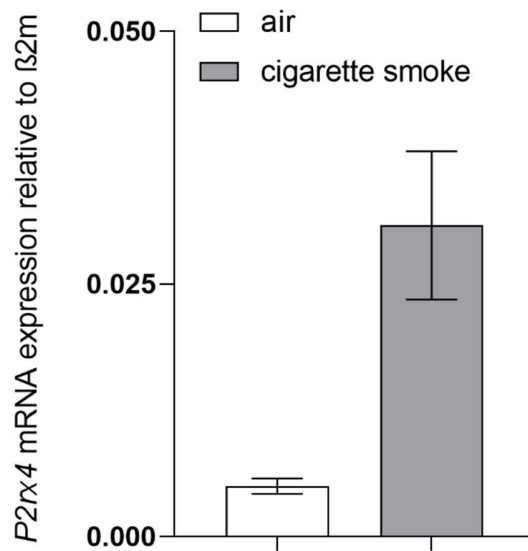

### Supplementary Figure 1

Relative *P2rx4* expression in pooled BALF cells from 6 wild type mice per group. The *P2rx4* mRNA expression is quantified relative to  $\beta 2$  microglobulin mRNA ( $\beta 2m$ ) levels and presented as mean  $\pm$ SD of the triplicate assay.

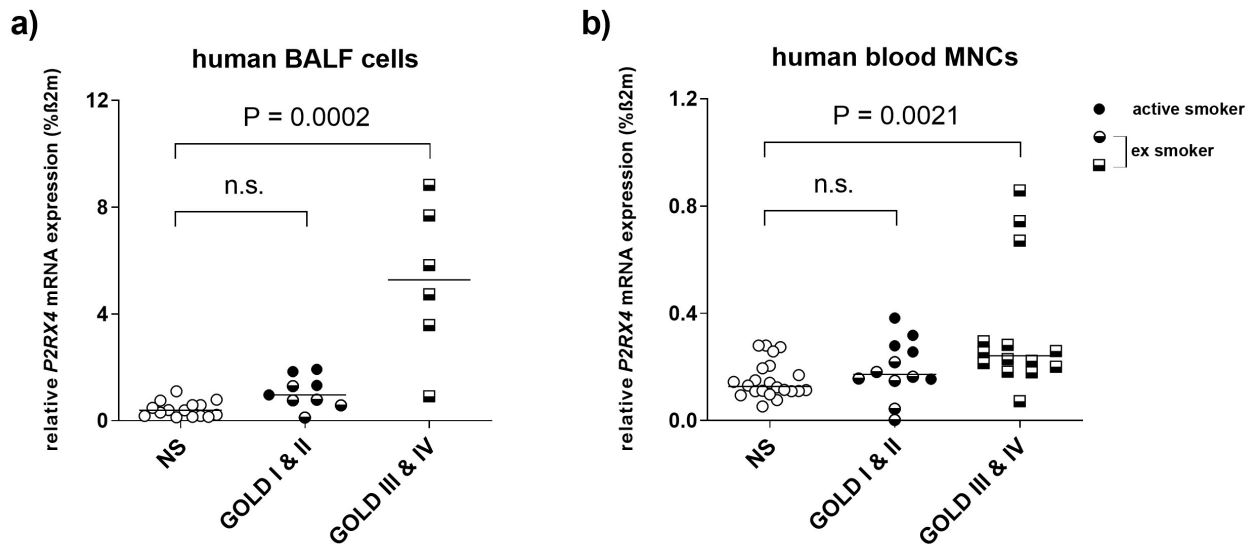

### Supplementary Figure 2

Relative *P2RX4* expression in a) BALF cells and b) peripheral blood MNCs of COPD patients stratified for GOLD classification into mild-moderate (GOLD I & II) and severe (GOLD III & IV) and compared to healthy never-smoking individuals (NS). *P2X4* mRNA expression is quantified relative to  $\beta 2$  microglobulin mRNA ( $\beta 2m$ ) levels. Median expression levels are presented as horizontal lines. Each symbol represents a subject (BALF: n=6-15, monocytes: n=12-22). Shapes completely black represent current smokers and half-filled shapes represent the ex-smokers among the COPD patients. Data was analyzed using Kruskal-Wallis test with Dunn's post-hoc test to correct for multiple comparison. P is depicted in the corresponding graph and was considered statistical significant when  $\leq 0.5$ . n.s. = non-significant

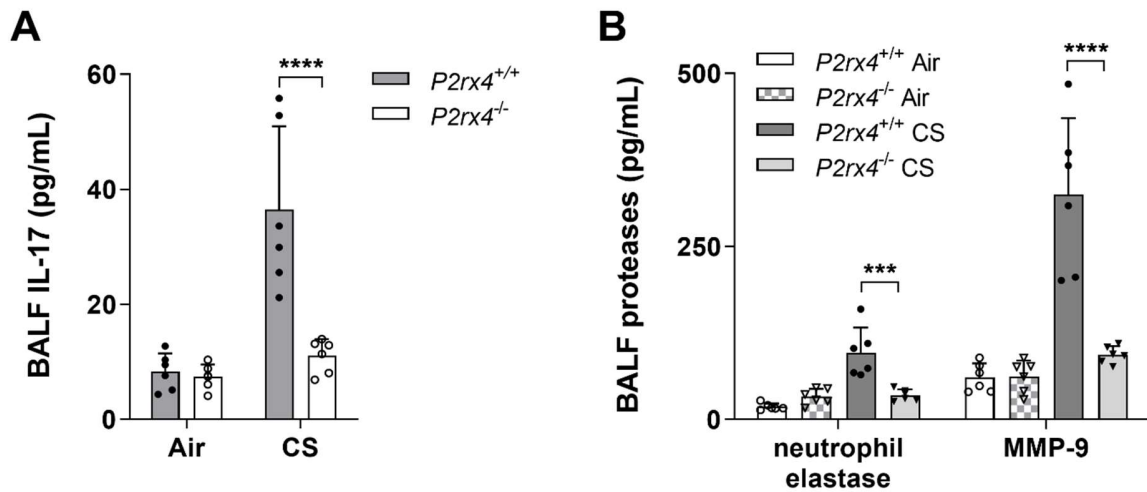

### Supplementary Figure 3

Concentration of A) IL-17, B) neutrophil elastase and MMP-9 in the BALF of *P2rx4*-deficient mice (*P2rx4*<sup>-/-</sup>) after cigarette smoke (CS) exposure for three consecutive days compared to wild type animals (*P2rx4*<sup>+/+</sup>). Each animal is represented by an individual symbol (n=6). Data is presented as mean +SD and was analysed applying two-way ANOVA corrected for multiple comparison using Tukey test. \*\*\* P<0.001, \*\*\*\* P<0.0001

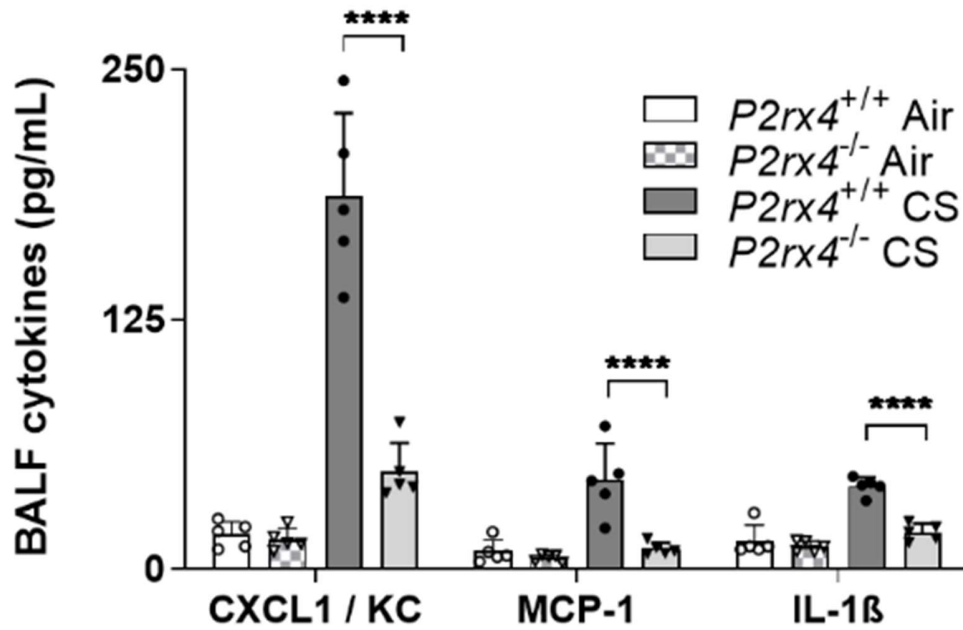

#### Supplementary Figure 4

Concentration of proinflammatory cytokines including CXCL1 / KC, IL-1 $\beta$  and IL-6 in the BALF of  $P2rx4$ -deficient mice ( $P2rx4^{-/-}$ ) after exposure with the smoke of 5 cigarettes per day, five days a week for four months compared to wild type animals ( $P2rx4^{+/+}$ ). Each animal is represented by an individual symbol (n=5). Data is presented as mean +SD and was analysed applying two-way ANOVA corrected for multiple comparison using Tukey test. \*\*\*\* P<0.0001

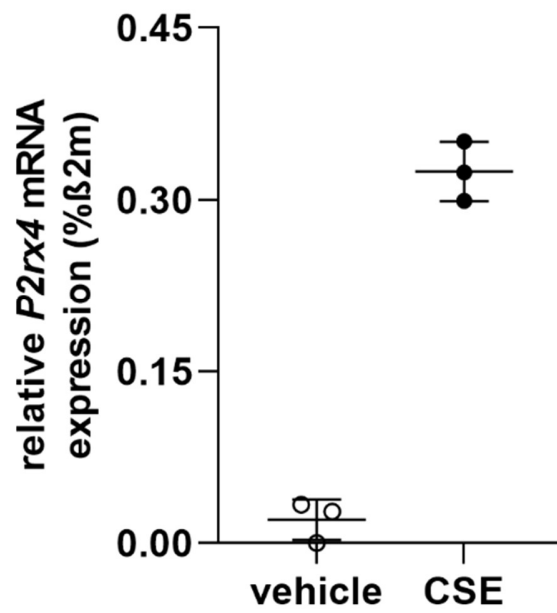

### Supplementary Figure 5

*P2rx4* expression quantified relative to  $\beta 2$  microglobulin mRNA ( $\beta 2m$ ) levels of bone marrow derived macrophages isolated from either wild type mice after vehicle or 5 % cigarette smoke extract stimulation. Mean  $\pm$  SD expression levels of the triplicate assay are presented as horizontal lines and the range is indicated by the error bars.

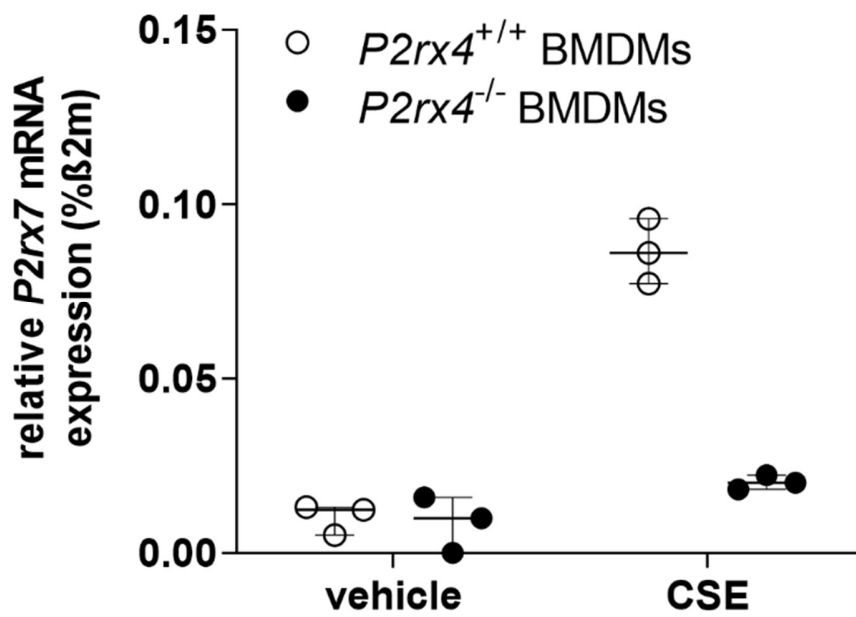

**Supplementary Figure 6**

*P2rx7* expression quantified relative to β2 microglobulin mRNA (β2m) levels of bone marrow derived macrophages isolated from either *P2rx4*-deficient or wild type mice after vehicle or 5 % cigarette smoke extract stimulation. Mean ± SD expression levels of the triplicate assay are presented as horizontal lines and the range is indicated by the error bars.
